# Supplementary material
Source: PubMed Central journal article supplement (PMC5411929)
Supplement: ajtr0009-1810-f6.pdf [file ajtr0009-1810-f6.pdf]

# MLN4924 protects against pulmonary fibrosis

**Supplementary Table 1.** Primers for quantitative real-time PCR

|              |         |                                    |       |
|--------------|---------|------------------------------------|-------|
| IL-1 $\beta$ | Forward | 5'-CAACCAACAAGTGATATTCTCCATG-3'    | Mouse |
|              | Reverse | 5'-GATCCACACTCTCCAGCTGCA-3'        |       |
| TNF $\alpha$ | Forward | 5'-GACCCTCACACTCAGATCAT-3'         | Mouse |
|              | Reverse | 5'-TTGAAGAGAACCTGGGAGTA-3'         |       |
| iNOS         | Forward | 5'-CTCAACCAGCAGTCCCTAGACA-3'       | Mouse |
|              | Reverse | 5'-TCCAGGTCCAGGAGACGGTA-3'         |       |
| MCP-1        | Forward | 5'-ACTGAAGCCAGCTCTCTCTTCTC-3'      | Mouse |
|              | Reverse | 5'-TTCCTTCTGGGGTCAGCACAGAC-3'      |       |
| KC           | Forward | 5'-AGGGAATTCACCCAAGAAC-3'          | Human |
|              | Reverse | 5'-CACCAGTGAGCTTCTCTCTC-3'         |       |
| IL-8         | Forward | 5'-ATGACTTCCAAGCTGGCCGTG-3'        | Human |
|              | Reverse | 5'-GGAGTATGTCTTTATGCACTGACATCTA-3' |       |
| CXCL5        | Forward | 5'-GAGAGCTGCGTTGCGTTTG-3'          | Human |
|              | Reverse | 5'-TTTCTTGTTTCCACCGTCCA-3'         |       |
| GAPDH        | Forward | 5'-TGACAACCTTGGTATCGTGAAG-3'       | Human |
|              | Reverse | 5'-CAGTAGAGGCAGGGATGATGT-3'        |       |
|              | Forward | 5'-GTCGTGGAGTCTACTGGTGC-3'         | Mouse |
|              | Reverse | 5'-GAGCCCTCCACAATGCCAAA-3'         |       |

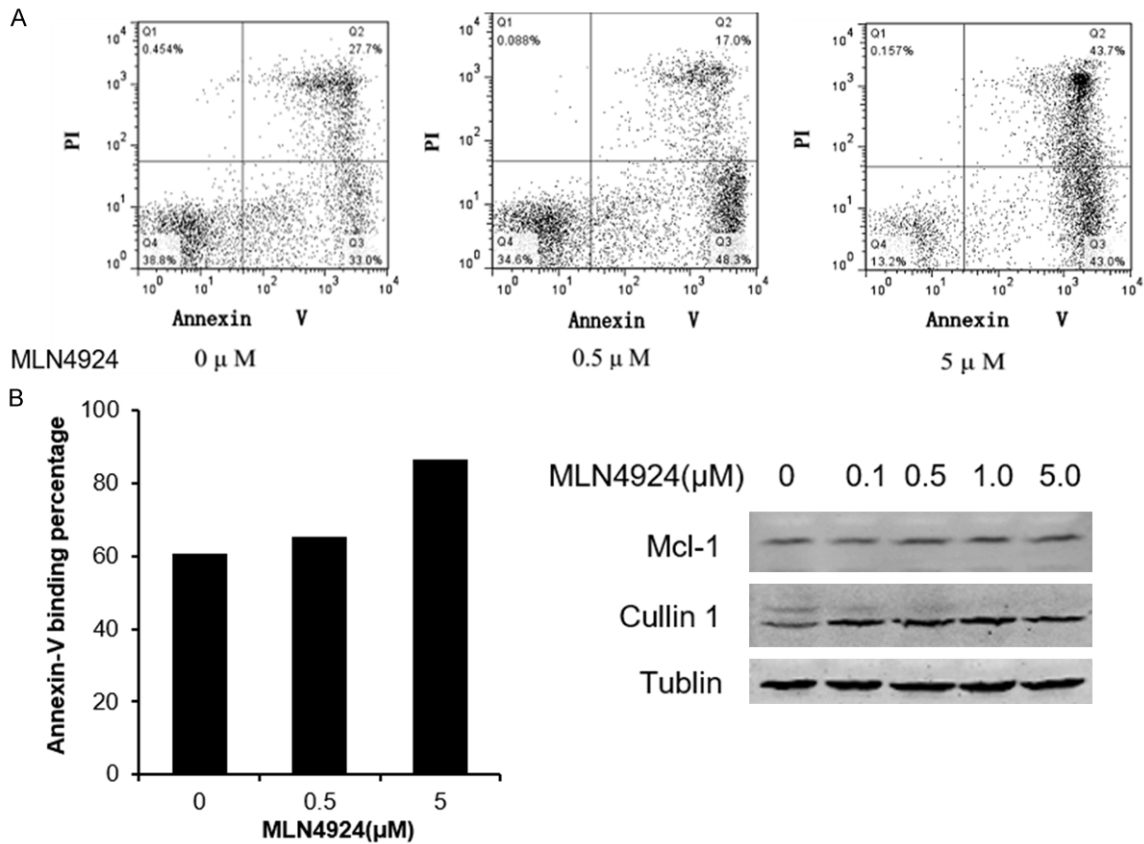

**Supplementary Figure 1.** MLN4924 has no significant influences on neutrophil apoptosis at early stage of lung injury. A. FACS analysis of apoptotic neutrophil (PI+annexin-V+) numbers stimulated by MLN4924 of indicated doses. Error bars represent mean  $\pm$  SD. B. Western blot analysis of neutrophil apoptosis under stimulations of MLN4924 with the indicated antibodies.
